# Supplementary material
Source: PubMed Central journal article supplement (PMC4285392)
Supplement: NIHMS619253-supplement-01.pdf [file NIHMS619253-supplement-01.pdf]

A

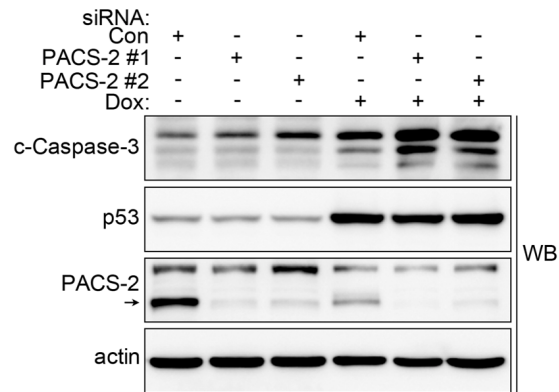

B

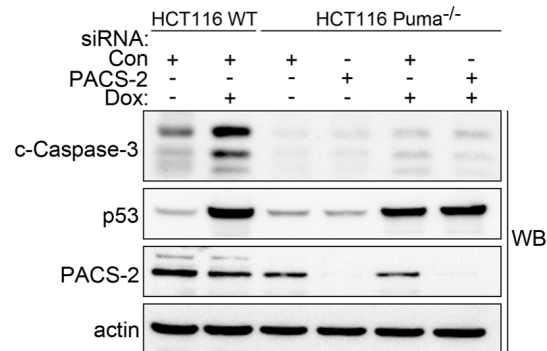

C

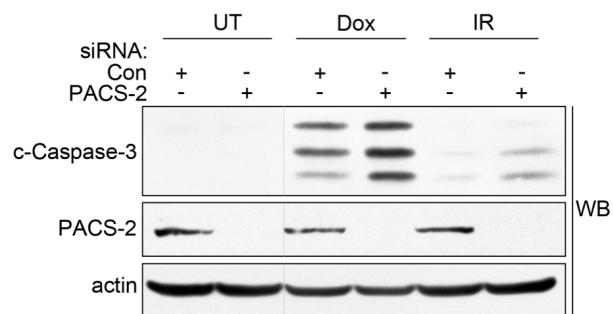

**Figure S1, Related to Figure 1. (A)** HCT116 cells were transfected with Control (Con) or PACS-2 siRNAs from Dharmacon (#1) or Qiagen (#2) for 48hr, treated for an additional 48hr with 0.5  $\mu$ M Dox, harvested and analyzed by western blot. Quantitation (AlphaView, Protein Simple) showed PACS-2 knockdown led to a 2.3-fold increase in cleaved caspase-3 compared to Dox-treated control cells. Arrow, PACS-2. **(B)** HCT116 WT or HCT116 Puma<sup>-/-</sup> cells were transfected with Con or PACS-2 siRNAs for 48hr, treated for an additional 48hr with 0.5  $\mu$ M Dox, harvested and analyzed by western blot. **(C)** HCT116 WT cells were transfected with Con or PACS-2 siRNAs for 48hr, treated for an additional 48hr with 0.5  $\mu$ M Dox or 20 Gy IR, harvested and analyzed by western blot.

A

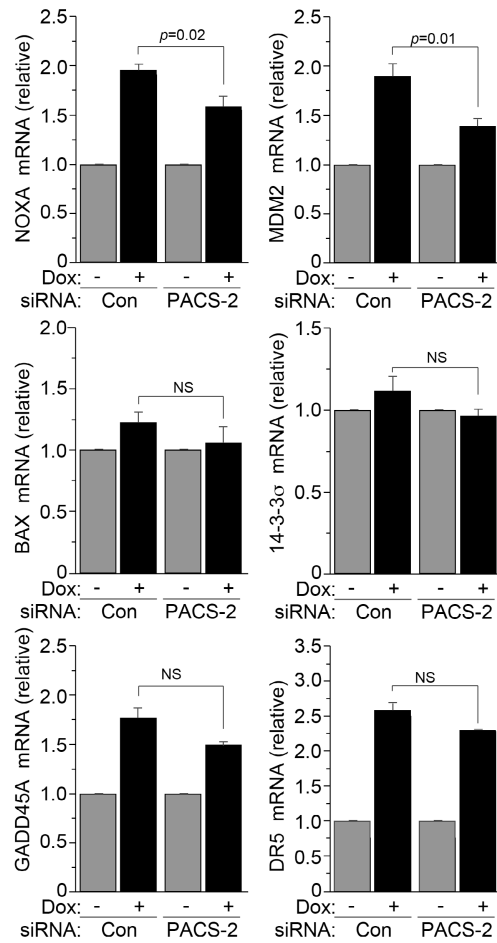

B

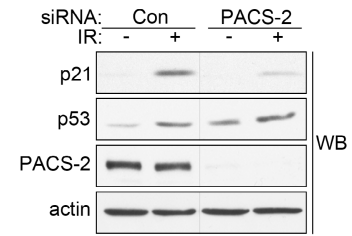

C

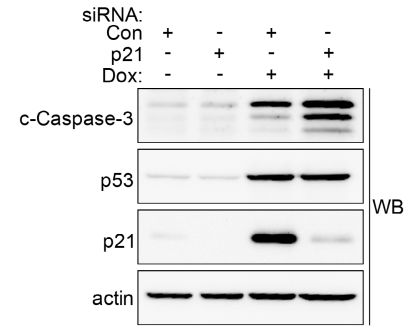

D

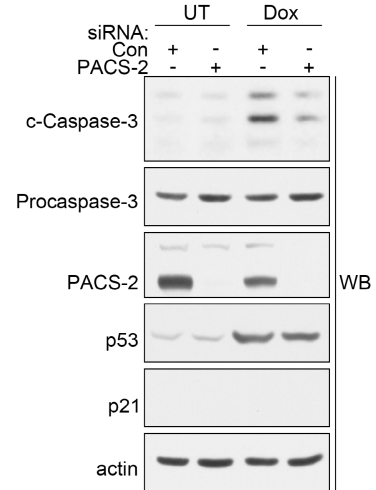

**Figure S2, Related to Figure 1. (A)** HCT116 WT cells from Figure 1, panel C were analyzed for the indicated transcripts by qRT-PCR (normalized to GAPDH). NS  $\geq$  0.05. **(B)** U2OS cells were transfected with Con or PACS-2 siRNAs for 72hr, treated with 20 Gy IR 24hr prior to harvest and analyzed by western blot. **(C)** HCT116 WT cells were transfected with Con or p21 siRNAs for 48hr, treated for an additional 48hr with 0.5  $\mu$ M Dox and analyzed by western blot. Quantitation (AlphaView, Protein Simple) showed p21 knockdown led to a 2.2-fold increase in cleaved caspase-3 compared to p21 replete cells. **(D)** HCT116 p21<sup>-/-</sup> cells were transfected with control or PACS-2 siRNAs for 48 hr and then treated for an additional 48 hr with 0.5  $\mu$ M Dox, harvested and analyzed by western blot.

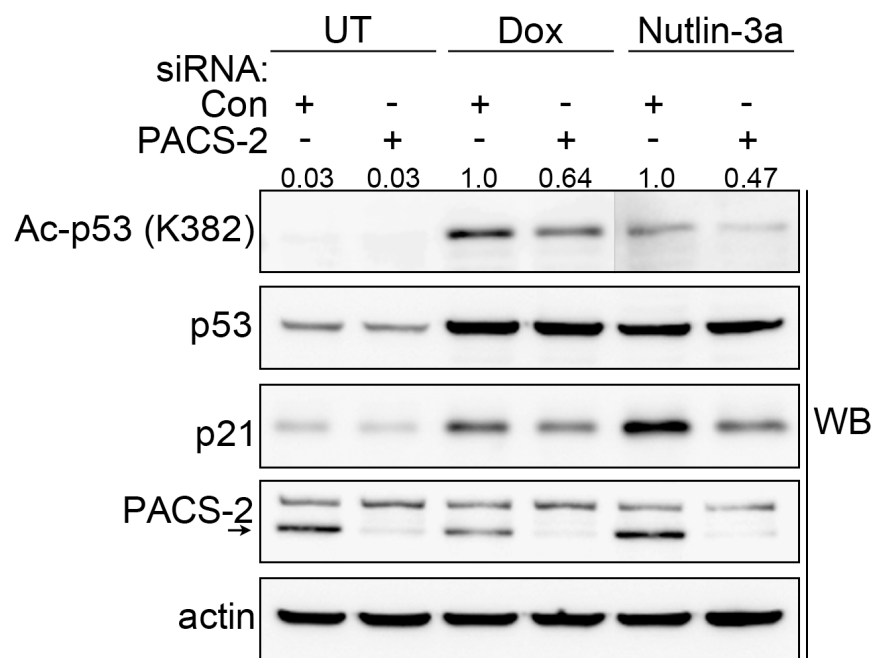

**Figure S3, Related to Figure 2.** HCT116 WT cells were transfected with Con or PACS-2 siRNAs for 48hr, treated for an additional 24hr with 0.5  $\mu$ M Dox or 4  $\mu$ M Nutlin-3a and analyzed by western blot. Ac-p53 (K<sub>382</sub>) was quantified and normalized to total p53 (AlphaView, Protein Simple). A longer exposure of the Ac-p53 (K<sub>382</sub>) blot for the Nutlin-3a treated samples is shown. Arrow, PACS-2.

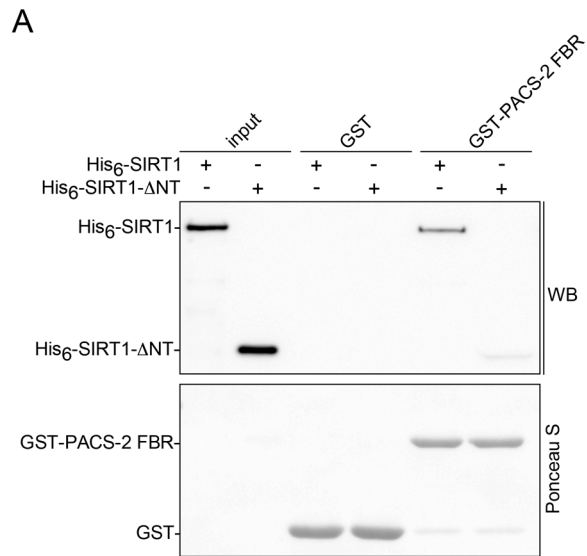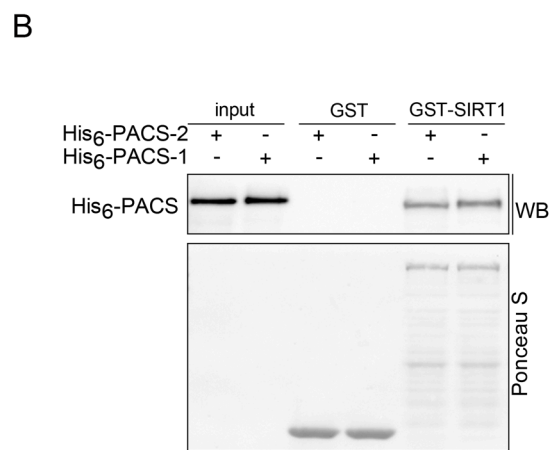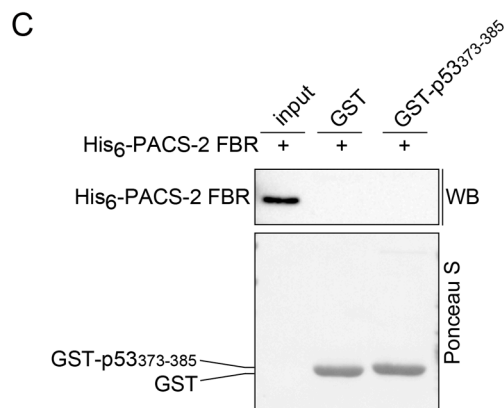

**Figure S4, Related to Figure 7. (A)** His<sub>6</sub>-tagged full-length SIRT1 or SIRT1-ΔNT were incubated with GST-PACS-2<sub>FBR</sub> or GST, captured with glutathione sepharose and bound SIRT1 or SIRT1-ΔNT were detected by western blot. Input GST and GST-PACS-2<sub>FBR</sub> were detected with Ponceau S. **(B)** Full length His<sub>6</sub>-tagged PACS-1 or PACS-2 were incubated with GST-SIRT1 or GST, captured with glutathione agarose and bound PACS-1 or PACS-2 were detected by western blot. Input GST and GST-SIRT1 were detected with Ponceau S. **(C)** His<sub>6</sub>-tagged PACS-2<sub>FBR</sub> was incubated with GST-p53<sub>373-385</sub> or GST, captured with glutathione sepharose and bound PACS-2<sub>FBR</sub> was detected by western blot. Input GST and GST-p53<sub>373-385</sub> were detected with Ponceau S.

**TABLE S1**

Mean percentage of cells in each cell cycle phase  $\pm$  SD from 4 independent experiments. Statistical significance determined using an unpaired Student's t-test. Related to Figure 1.

|                                | untreated      |                | Doxorubicin (24 hr) |                |                |
|--------------------------------|----------------|----------------|---------------------|----------------|----------------|
| siRNA:                         | Con            | PACS-2         | Con                 | PACS-2         | <i>p</i> value |
| G <sub>0</sub> /G <sub>1</sub> | 7.4 $\pm$ 0.4  | 6.8 $\pm$ 1.4  | 24.7 $\pm$ 3.1      | 15.3 $\pm$ 1.7 | 0.004          |
| S                              | 87.7 $\pm$ 0.5 | 88.6 $\pm$ 3.4 | 63 $\pm$ 3.1        | 70.5 $\pm$ 1.6 | 0.012          |
| G <sub>2</sub> /M              | 3.8 $\pm$ 0.5  | 3.6 $\pm$ 2.1  | 10.1 $\pm$ 0.3      | 11.6 $\pm$ 0.7 | 0.013          |

**TABLE S2**

Mean percentage of cells in each cell cycle phase  $\pm$  SD from 3 independent experiments. Statistical significance determined using an unpaired Student's t-test to compare Dox vs. Dox + EX-527 for each siRNA condition. Related to Figure 5.

| siRNA                          | Control        |                |                    |                |
|--------------------------------|----------------|----------------|--------------------|----------------|
|                                | UT             | Dox            | Dox<br>+<br>EX-527 | <i>p</i> value |
| G <sub>0</sub> /G <sub>1</sub> | 6.2 $\pm$ 0.5  | 28.4 $\pm$ 1.2 | 29.9 $\pm$ 1.0     | 0.17           |
| S                              | 91.1 $\pm$ 0.6 | 59.6 $\pm$ 2.1 | 55.8 $\pm$ 1.6     | 0.07           |
| G <sub>2</sub> /M              | 2.8 $\pm$ 0.5  | 12 $\pm$ 1.1   | 14.2 $\pm$ 0.6     | 0.05           |
| siRNA                          | PACS-2         |                |                    |                |
| G <sub>0</sub> /G <sub>1</sub> | 4.9 $\pm$ 0.6  | 18.0 $\pm$ 0.9 | 25.7 $\pm$ 0.9     | <0.001         |
| S                              | 92.8 $\pm$ 0.5 | 67.0 $\pm$ 2.5 | 58.8 $\pm$ 3.2     | 0.03           |
| G <sub>2</sub> /M              | 2.3 $\pm$ 0.4  | 15 $\pm$ 1.8   | 15.5 $\pm$ 3.6     | 0.9            |
| siRNA                          | p21            |                |                    |                |
| G <sub>0</sub> /G <sub>1</sub> | 5.2 $\pm$ 0.2  | 10.1 $\pm$ 1.5 | 11.3 $\pm$ 0.6     | 0.6            |
| S                              | 92.3 $\pm$ 0.5 | 79.0 $\pm$ 1.2 | 75.5 $\pm$ 1.4     | 0.1            |
| G <sub>2</sub> /M              | 2.5 $\pm$ 0.6  | 10.3 $\pm$ 2.7 | 13.2 $\pm$ 1.4     | 0.2            |
